# Supplementary material
Source: publisher figshare collection journal article supplement (https://acs.figshare.com/ndownloader/files/8238797)
Supplement: Supplementary file 1 [file 8238797]

## Supporting Information

### Transient Resonance Raman Spectroscopy of a Light-Driven Sodium-Ion-Pump Rhodopsin from *Indibacter alkaliphilus*

Kousuke Kajimoto,<sup>†</sup> Takashi Kikukawa,<sup>‡,||</sup> Hiroki Nakashima,<sup>†</sup> Haruki Yamaryo,<sup>†</sup>  
Tomotsumi Fujisawa,<sup>†</sup> Makoto Demura,<sup>‡,||</sup> and Masashi Unno<sup>†</sup>

<sup>†</sup>Department of Chemistry and Applied Chemistry, Graduate School of Science and Engineering, Saga University, Saga 840-8502, Japan, <sup>‡</sup>Faculty of Advanced Life Science, Hokkaido University, Sapporo 060-0810, Japan, <sup>||</sup>Global Station for Soft Matter, Global Institution for Collaborative Research and Education, Hokkaido University, Sapporo 060-0810, Japan

#### 1. Supplemental Figures

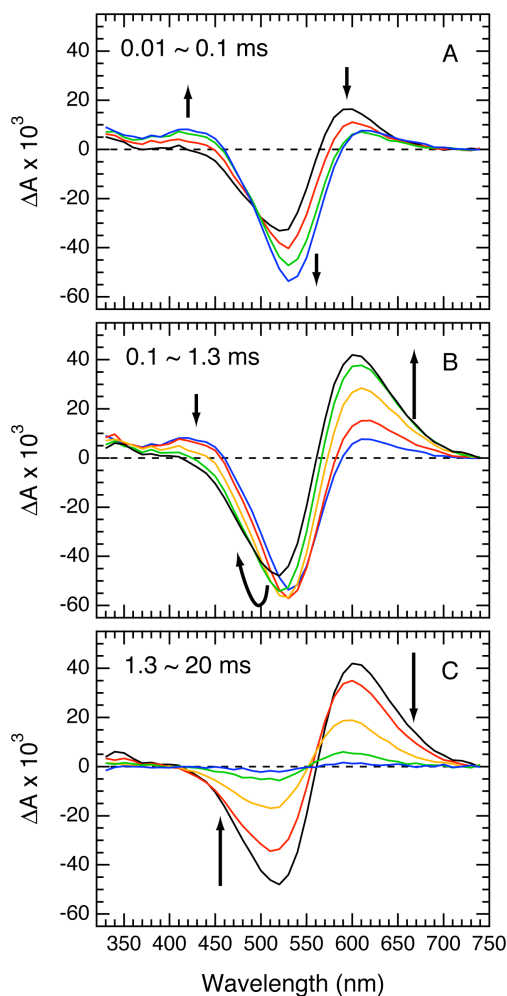

Figure S1. Transient flash-induced absorption changes of NaR from *Indibacter alkaliphilus* in three different time ranges.

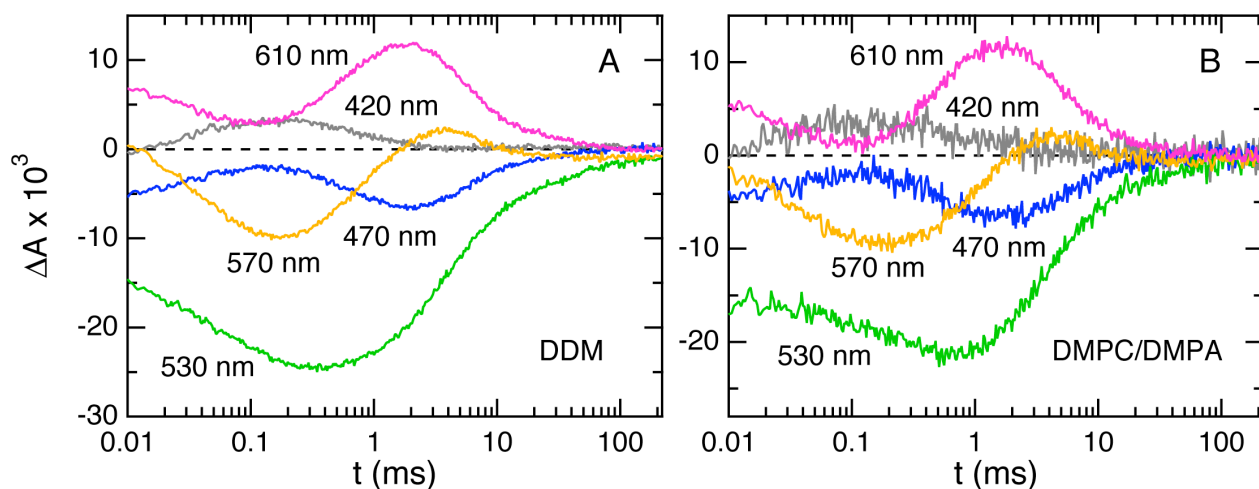

Figure S2. Transient flash-induced absorption changes of NaR from *I. alkaliphilus*. Measurements were performed at 25°C in 50 mM Tris-HCl, pH 7.0, 0.2 M NaCl. (A) NaR was solubilized by 0.05% DDM. (B) NaR was reconstituted with a 9:1 (w/w) mixture of 1,2-dimyristoyl-sn-glycero-3-phosphocholine/1,2-dimyristoyl-sn-glycero-3-phosphate (DMPC/DMPA) at 1:20 protein-to-lipid (Mole fraction) ratio.

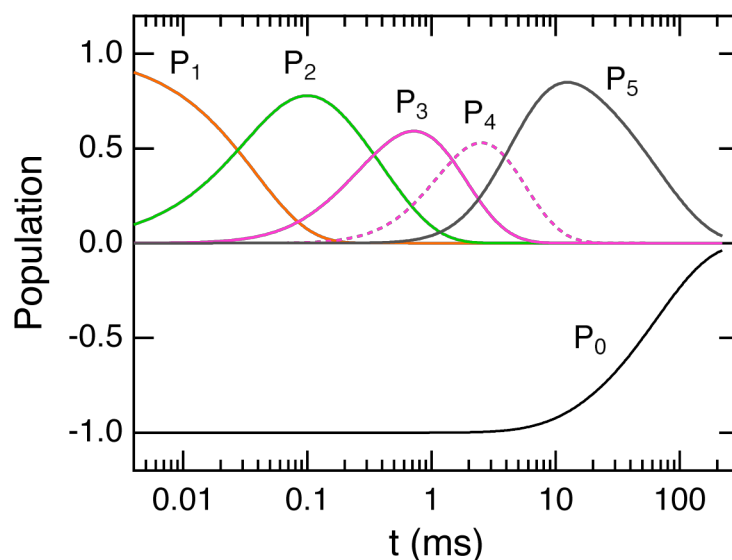

Figure S3. Time-dependent population changes of  $P_0$ – $P_5$  states.  $P_0$  is the initial dark state, whereas  $P_1$ – $P_5$  are the kinetically defined states calculated by global fitting.

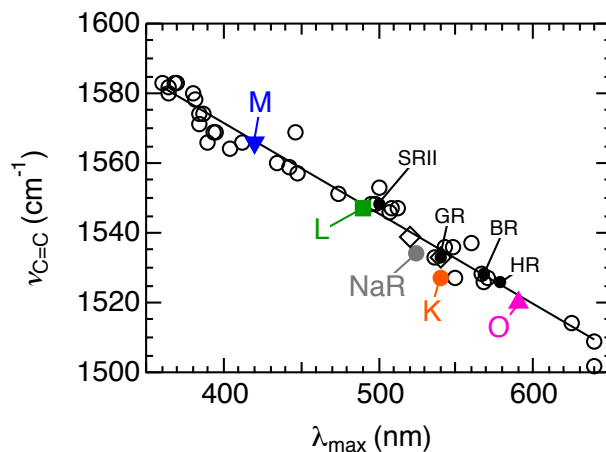

Figure S4. Plot of the observed ethylenic stretching frequency  $\nu_{C=C}$  and the absorption maximum  $\lambda_{max}$  of retinal proteins and model compounds. The closed symbols in black represent data for the light-adapted BR, HR from *Natronomonas pharaonis*, GR, and SR11 from *Natronomonas pharaonis*.<sup>1</sup> The colored symbols are data for NaR from *Indibacter alkaliphilus*: dark state NaR (black), K (orange), L (green), M (blue), and O (magenta). The open circles are data for several retinal proteins and model compounds taken from Ref 1 and Ref 2.

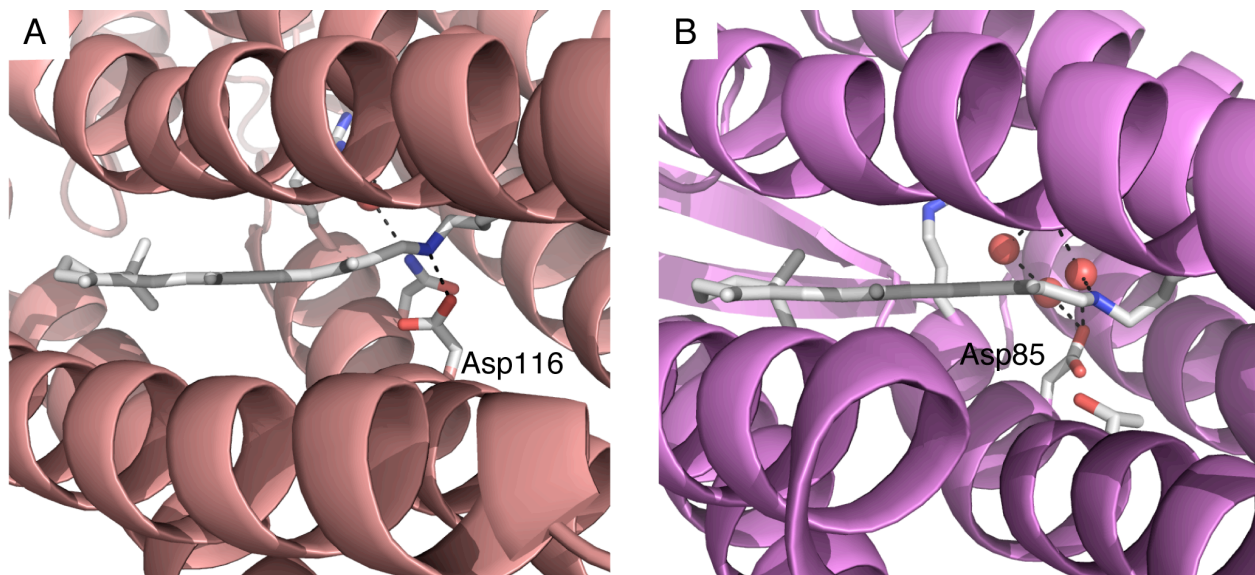

Figure S5. Structural differences in the all-trans retinal chromophore between NaR (KR2) and BR. The active site structures of (A) KR2 and BR based on their crystal structure. PDB codes: 3X3C (KR2) and 1C3W (BR).

Table S1. Selected Dihedral Angles of the Retinal Chromophore for NaR (KR2), BR, PR, and SRII

|                         | C6-C7  | C7-C8  | C8-C9  | C9-C10 | C10-C11 | C11-C12 | C12-C13 | C13-C14 | C14-C15 | C15-N  |
|-------------------------|--------|--------|--------|--------|---------|---------|---------|---------|---------|--------|
| KR2, 3X3C <sup>a</sup>  | -170.2 | 176.9  | 174.3  | 177.2  | -179.1  | 167.49  | -166.7  | 169.4   | 162.5   | 142.0  |
| KR2, 3X3B <sup>b</sup>  | 179.9  | 178.5  | -178.6 | 178.8  | -179.1  | 174.1   | -172.0  | 179.7   | -177.3  | 137.5  |
| KR2, 4XTL <sup>c</sup>  | -178.7 | 176.7  | -179.8 | -177.7 | -174.1  | 169.88  | 177.7   | 174.9   | -173.1  | 137.1  |
| KR2,4 XTN <sup>d</sup>  | -179.5 | 179.4  | -179.9 | -178.3 | -169.5  | 164.08  | -179.2  | 179.4   | 177.7   | 139.6  |
| KR2, 4XTO <sup>e</sup>  | 179.9  | -179.8 | -179.8 | -179.7 | -160.9  | -172.41 | -179.6  | 179.9   | 174.0   | 125.1  |
| BR, 1C3W <sup>f</sup>   | 176.3  | 175.2  | -173.7 | -178.5 | 178.8   | 178.9   | 177.6   | -156.9  | 179.0   | -162.7 |
| GPR, 2L6X <sup>g</sup>  | 175.5  | 176.7  | -158.1 | -176.8 | 177.2   | -176.0  | -170.7  | -173.4  | -169.6  | -166.4 |
| BPR, 4JQ6 <sup>h</sup>  | 179.3  | -179.7 | 179.9  | -179.9 | -179.6  | 179.7   | 179.8   | -179.9  | -179.4  | -171.5 |
| SRII, 1H68 <sup>i</sup> | 177.9  | 179.9  | 177.6  | -179.2 | 177.6   | -178.3  | 178.1   | -179.4  | 179.1   | -143.4 |

<sup>a</sup>KR2 at pH 4.0. Ref. 3. <sup>b</sup>KR2 at pH 7.5–8.5. Ref. 3. <sup>c</sup>Type A KR2 crystal in Ref. 4. pH 4.3. <sup>d</sup>Type B KR2 crystal in Ref. 4. pH 4.9. <sup>e</sup>Type C KR2 crystal in Ref. 4. pH 5.6. <sup>f</sup>The crystal structure of BR, Ref. 5. <sup>g</sup>The green-light absorbing PR solved by solution NMR spectroscopy. Ref. 6. <sup>h</sup>The crystal structure of blue-light absorbing PR. Ref. 7. <sup>i</sup>The crystal structure of SRII from *Natronomonas pharaonis*, Ref. 8.

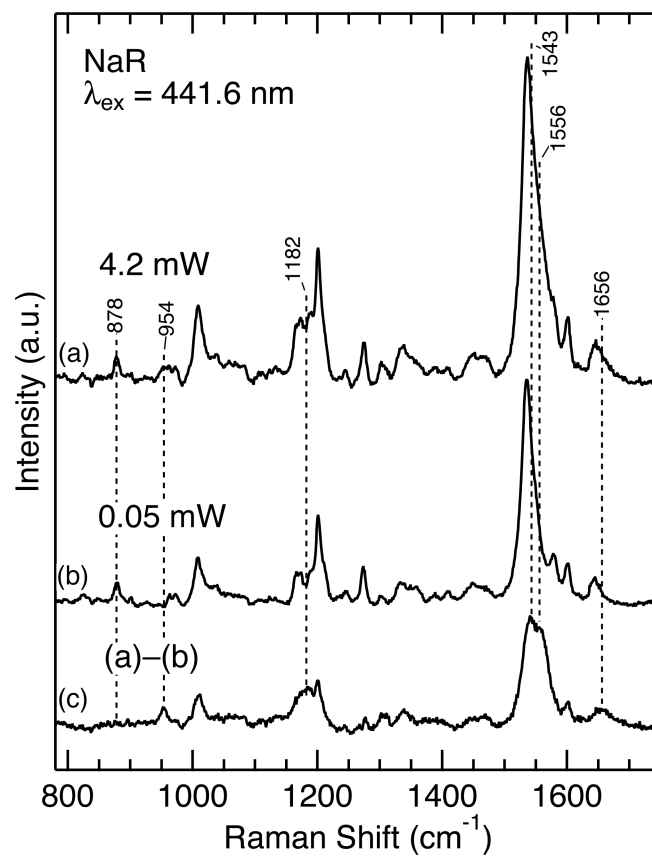

Figure S6. Transient resonance Raman spectra of photointermediates for NaR from *Indibacter alkaliphilus*. The excitation wavelength was 441.6 nm, and the medium was 50 mM Tris-HCl buffer, 400 mM NaCl, and 0.05% DDM at pH 8.0.

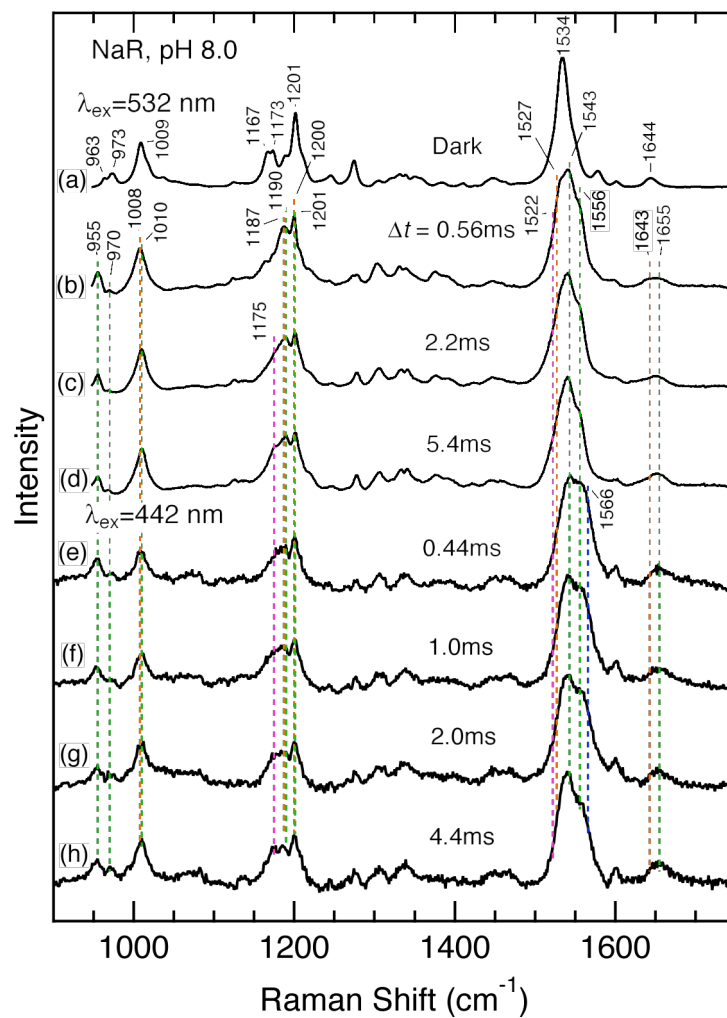

Figure S7. Transient resonance Raman spectra of NaR from *Indibacter alkaliphilus* with 532 nm (a–d) and 441.6 nm (e–h) excitation.

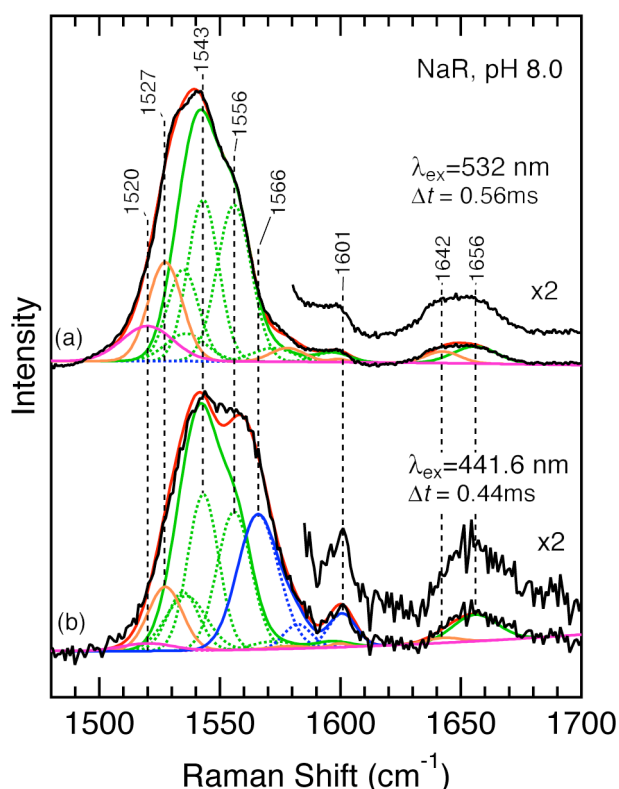

Figure S8. A global fitting analysis of the transient resonance Raman spectra of NaR from *Indibacter alkaliphilus*. (a)  $\lambda_{\text{ex}} = 532$  nm,  $\Delta t = 0.56$  ms. (b)  $\lambda_{\text{ex}} = 441.6$  nm,  $\Delta t = 0.44$  ms. The magnified spectra are also displayed in the C=N stretching region. The spectra for K (orange), L (green), M (blue), and O (magenta) intermediates are shown. Dotted lines represent the individual Gaussian band shape components.

## 2. Supplemental Experimental Section

### Expression and Purification of IaNaR

*Escherichia coli* (*E. coli*) strain DH5 $\alpha$  was used for DNA manipulation. The IaNaR gene (GenBank accession number: EOZ93469) was amplified by PCR from the genomic DNA of *Indibacter alkaliphilus* KCTC 22604 and firstly ligated to the *Nde*I/*Xho*I site of the pET-21c (+) vector (Merck). This plasmid encodes IaNaR having additional amino acids in the C-terminus (-LEHHHHHH). Next, the IaNaR coding region was amplified by PCR while introducing the *Hind*III site after the stop codon. The resultant DNA fragment was inserted into the pKA001 vector under the lacUV5 promoter with *Nde*I and *Hind*III sites.<sup>9</sup> The DNA sequence was confirmed by a standard procedure using an automated DNA sequencer (model 3100, Applied Biosystems, Foster City, CA, USA).

*E. coli* strain BL21 was used for the expression and purification of IaNaR. The procedures were essentially the same as the ones previously described.<sup>1</sup> Briefly, the cells harboring the pKA001 vector were grown in 2  $\times$  YT medium at 37°C, and expression was induced by the addition of 1 mM isopropyl- $\beta$ -D-thiogalactopyranoside in the presence of 10  $\mu$ M all-trans retinal.

After 4 h of induction, the cells were harvested and broken with a French press. The collected cell membrane fraction was solubilized with 1.5% n-dodecyl  $\beta$ -D-maltopyranoside (DDM) (Dojindo Lab., Kumamoto, Japan), and the solubilized IaNaR was purified using Ni-NTA agarose (Qiagen, Hilden, Germany). The yield of IaNaR was approximately 30 mg from 1 L culture. The concentration of IaNaR was determined from the absorbance at 525 nm with an assumed extinction coefficient of  $50,000 \text{ M}^{-1} \text{ cm}^{-1}$ .

### Determination of the $P_0$ Spectrum

The absorption spectrum of  $P_0$  state was determined from the measured spectrum of the dark state and used for the spectral calculations of the  $P_i$  states in Figure 3. The procedures were shown in Figure S9. Besides the scattering background, the measured spectrum (black line in the inset) includes three absorption bands: main band around 525 nm,  $\beta$ -band around 400 nm and the band from the aromatic amino acid residues around 280 nm. For the same analyses in the previous reports,<sup>1</sup> we used the sum of former two bands as the  $P_0$  spectrum. However, the presence of  $\beta$ -band often confuses the appearance of short wavelength intermediates in the  $P_i$  states. Here, we estimated the main band and used as the  $P_0$  spectrum. Firstly, we estimated the scattering background (red broken line in the inset) by the term of  $\alpha / \lambda^4$  ( $\lambda$  in nm). The determined value of  $\alpha$  was  $1.43 \times 10^9$ . This scattering curve was subtracted from the measured spectrum. For the resultant spectrum (red solid line), we estimated the  $\beta$ -band (blue line) by the skewed Gaussian function, which is defined by the four parameters:  $\lambda_{\text{max}}$  (in nm),  $A_{\text{max}}$  (amplitude at  $\lambda_{\text{max}}$ ),  $\rho$  (skewness of the band) and  $\Delta\nu$  (half-bandwidth in  $\text{cm}^{-1}$ ).<sup>10</sup> The determined values were  $\lambda_{\text{max}} = 380 \text{ nm}$ ,  $A_{\text{max}} = 0.057$ ,  $\rho = 1.34$ , and  $\Delta\nu = 5345 \text{ cm}^{-1}$ , respectively. Then, the main band (black line) was calculated by subtracting the  $\beta$ -band from the spectrum shown in red solid line.

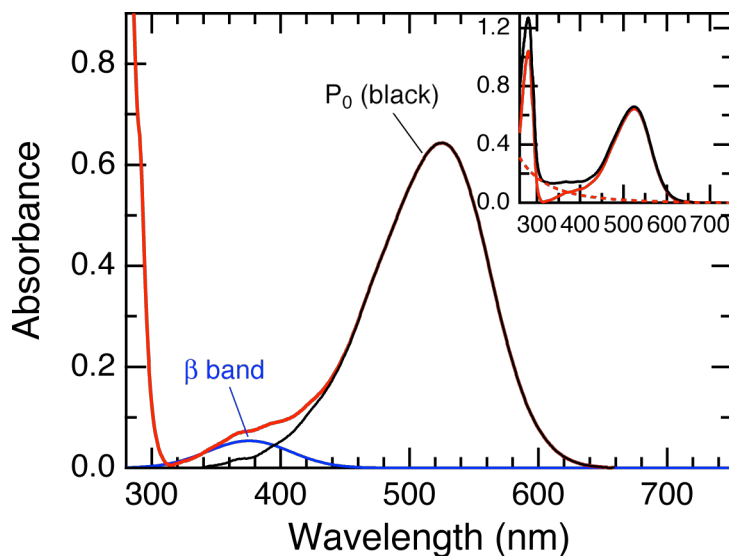

Figure S9. Determination of the  $P_0$  spectrum. The main absorption band around 525 nm (black line) was calculated by subtracting the scattering background (broken line in the inset) and the  $\beta$ -band (blue line) from the measured absorption spectrum of the dark state (black line in the inset), and then used as the  $P_0$  spectrum (for details see text).



## References

- (1) Tateishi, Y.; Abe, T.; Tamogami, J.; Nakao, Y.; Kikukawa, T.; Kamo, N.; Unno, M. Spectroscopic Evidence for the Formation of an N Intermediate during the Photocycle of Sensory Rhodopsin II (Phoborhodopsin) from *Natronobacterium pharaonis*. *Biochemistry* **2011**, *50*, 2135–2143.
- (2) Heyde, M. E.; Gill, D.; Kilponen, R. G.; Rimai, L. Raman Spectra of Schiff Bases of Retinal (Models of Visual Photoreceptors). *J. Am. Chem. Soc.* **1971**, *93*, 6776–6780.
- (3) Kato, H. E.; Inoue, K.; Abe-Yoshizumi, R.; Kato, Y.; Ono, H.; Konno, M.; Hososhima, S.; Ishizuka, T.; Hoque, M. R.; Kunitomo, H.; et al. Structural Basis for Na<sup>+</sup> Transport Mechanism by a Light-Driven Na<sup>+</sup> Pump. *Nature* **2015**, *521*, 48–53.
- (4) Gushchin, I.; Shevchenko, V.; Polovinkin, V.; Kovalev, K.; Alekseev, A.; Round, E.; Borshchevskiy, V.; Balandin, T.; Popov, A.; Gensch, T.; Fahlke, C.; Bamann, C.; Willbold, D.; Buldt, G.; Bamberg, E.; Gordeliy, V. Crystal Structure of a Light-Driven Sodium Pump. *Nat. Struct. Mol. Biol.* **2015**, *22*, 390–395.
- (5) Luecke, H.; Schobert, B.; Richter, H. T.; Cartailler, J. P.; Lanyi, J. K. Structure of Bacteriorhodopsin at 1.55 Å Resolution. *J. Mol. Biol.* **1999**, *291*, 899–911.
- (6) Reckel, S.; Gottstein, D.; Stehle, J.; Lohr, F.; Verhoefen, M. K.; Takeda, M.; Silvers, R.; Kainosho, M.; Glaubitz, C.; Wachtveitl, J.; Bernhard, F.; Schwalbe, H.; Guntert, P.; Dotsch, V. Solution NMR Structure of Proteorhodopsin. *Angew. Chem. Int. Ed.* **2011**, *50*, 11942–11946.
- (7) Ran, T.; Ozorowski, G.; Gao, Y.; Sineshchekov, O. A.; Wang, W.; Spudich, J. L.; Luecke, H. Cross-Protomer Interaction with the Photoactive Site in Oligomeric Proteorhodopsin Complexes. *Acta Crystallogr. Sect. D* **2013**, *69*, 1965–1980.
- (8) Royant, A.; Nollert, P.; Edman, K.; Landau, E. M.; Pebay-Peyroula, E.; Navarro, J. X-ray Structure of Sensory Rhodopsin II at 2.1-Å Resolution. *Proc. Natl. Acad. Sci. USA* **2001**, *98*, 10131–10136.
- (9) Lee, K. A.; Lee, S. S.; Kim, S. Y.; Choi, A. R.; Lee, J. H.; Jung, K. H. Mistic-fused Expression of Algal Rhodopsins in *Escherichia coli* and its Photochemical Properties. *Biochim. Biophys. Acta* **2015**, 1850, 1694–1703.
- (10) Chizhov, I.; Chernavskii, D. S.; Engelhard, M.; Mueller, K. H.; Zubov, B. V.; Hess, B. Spectrally Silent Transitions in the Bacteriorhodopsin Photocycle. *Biophys. J.* **1996**, *71*, 2329–2345.
